# Supplementary material for: High-Fat Diet-Induced Obesity Increases Brain Mitochondrial Complex I and Lipoxidation-Derived Protein Damage
Source: MDPI journal article supplement (doi:10.3390/antiox13020161), 2024-01-26

Figure S1: Western Blots raw data.

**Figure 2A**  
**Anti-NDUFV2**  
**SAB2107279, Sigma**

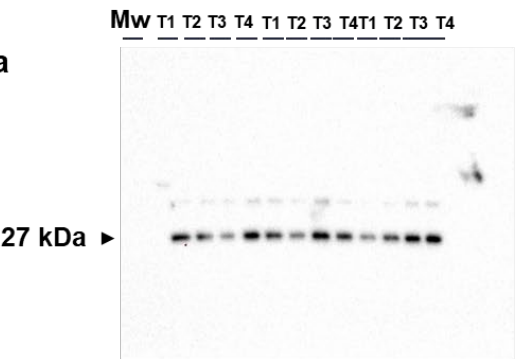

**Figure 2A**  
**Anti-NDUFS3**  
**459130, Invitrogen**

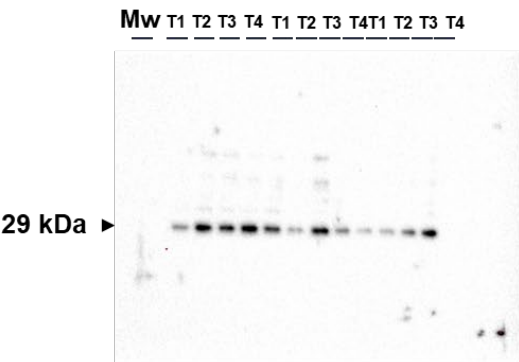

**Figure 2A**  
**Anti-NDUFS4**  
**96549, Abcam**

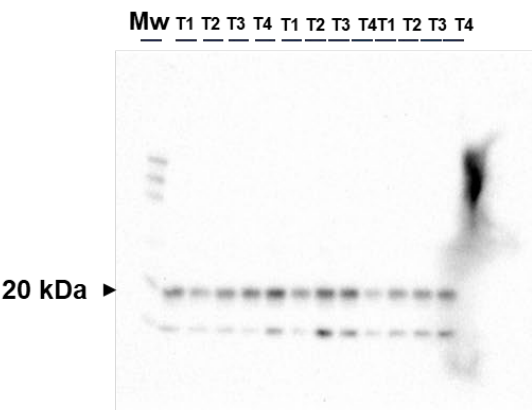

**Figure 2A**  
**Anti-NDUFA9**  
**459100, Life Tech**

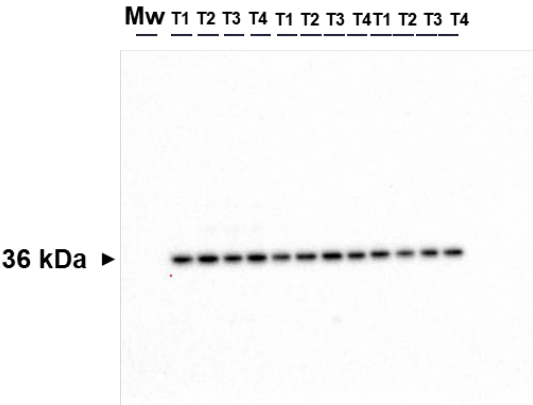

**Figure 2A**  
**Anti-VDAC/Porin**  
**Ab15898, Abcam**

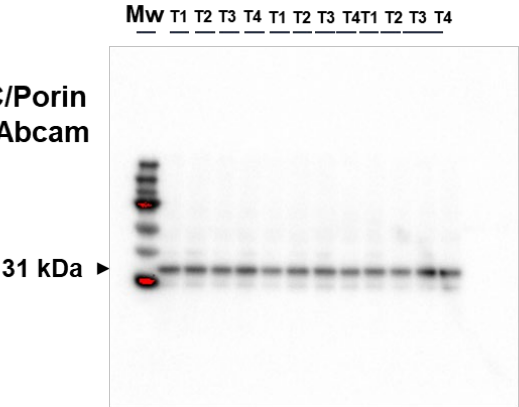

**Figure 2A**  
**Coomassie Blue**

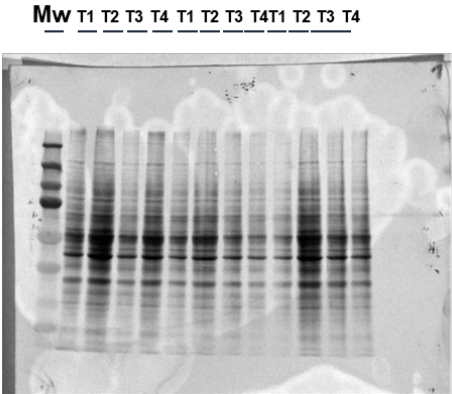

**Figure 2B**  
**Anti-Flavoprotein (Complex II)**  
**459200, Invitrogen**

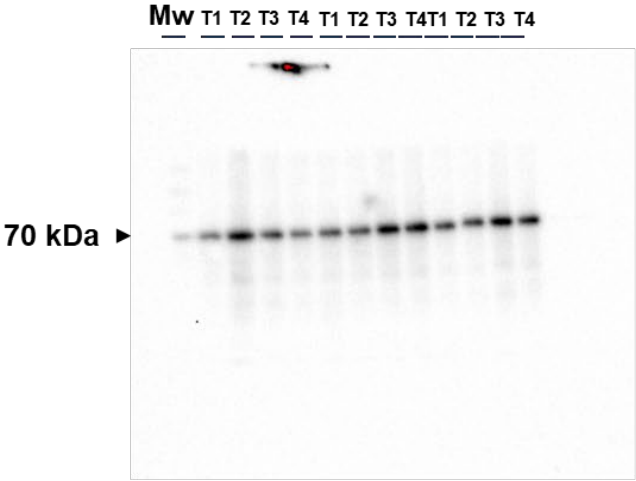

**Figure 2B**  
**Anti-VDAC/Porin**  
**Ab15898, Abcam**

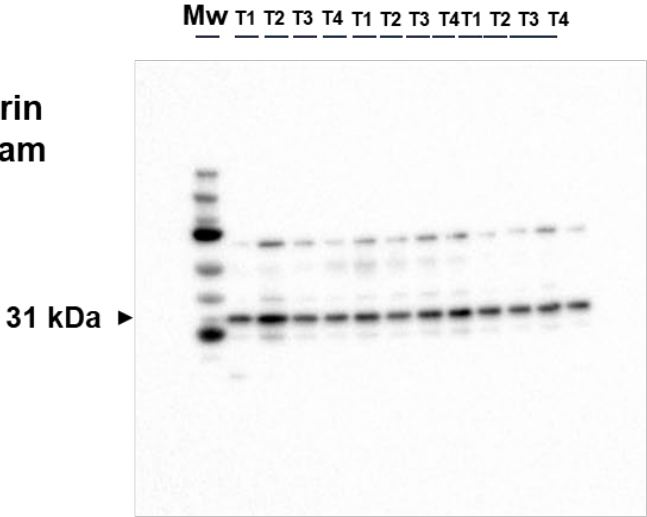

**Figure 2B**  
**Coomassie Blue**

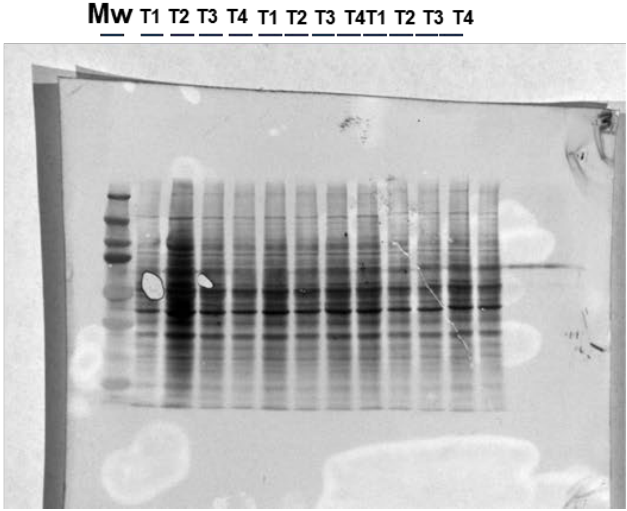

**Figure 2C**  
**Anti-CORE2 (Complex III)**  
**459220, Invitrogen**

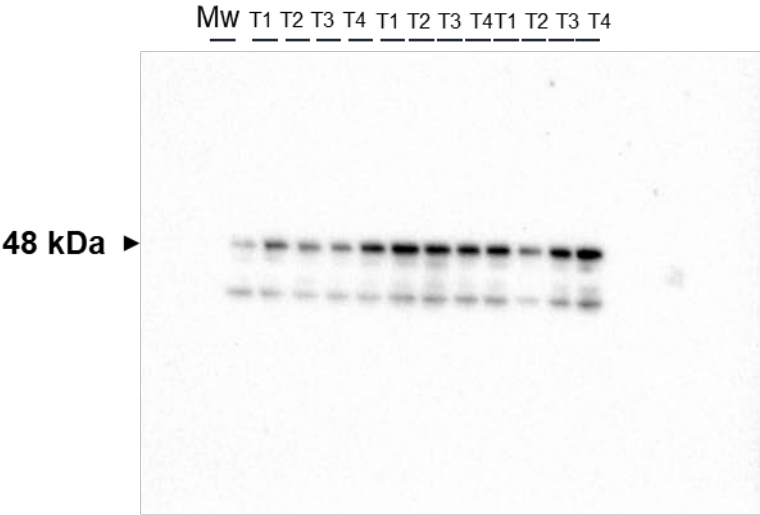

**Figure 2C**  
**Anti-VDAC/Porin**  
**Ab15898, Abcam**

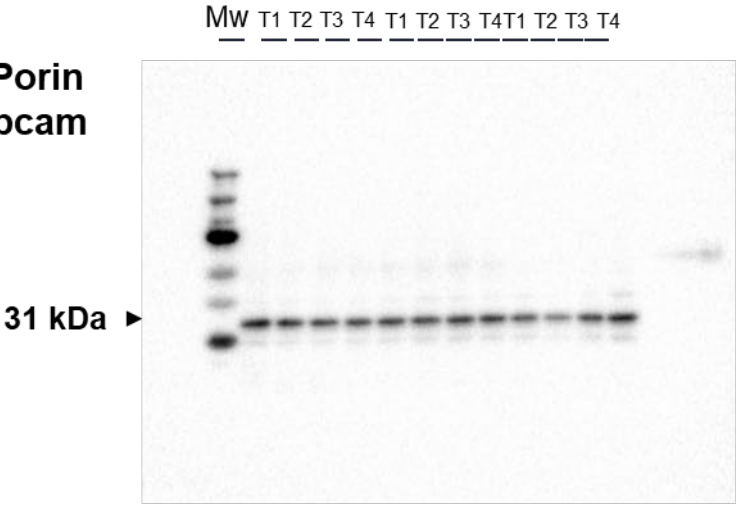

**Figure 2C**  
**Coomassie Blue**

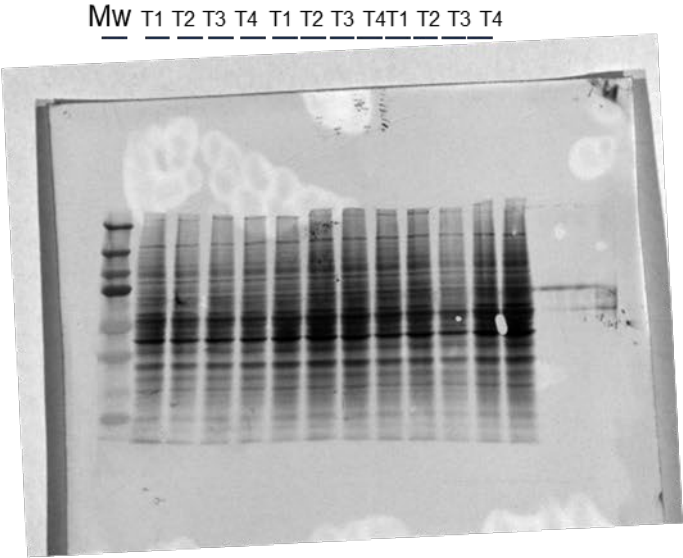

**Figure 2D**  
**Anti-COXI subunit**  
**(Complex IV)**  
**59600,Invitrogen**

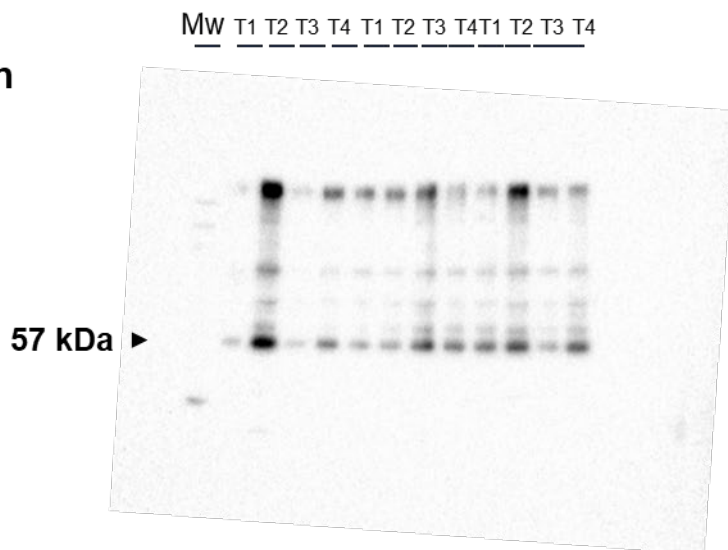

**Figure 2D**  
**Anti-VDAC/Porin**  
**Ab15898, Abcam**

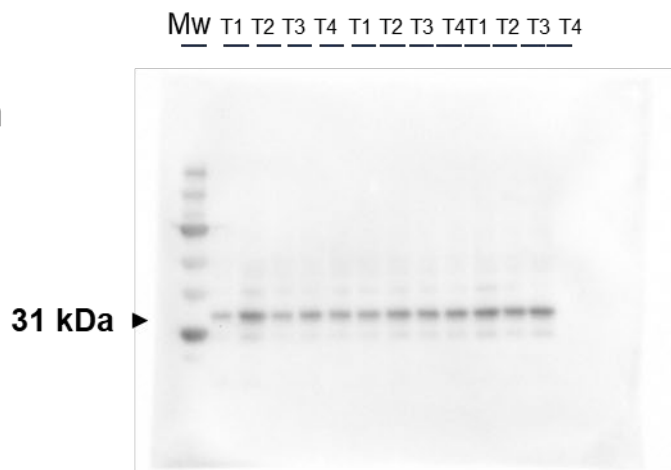

**Figure 2D**  
**Coomassie Blue**

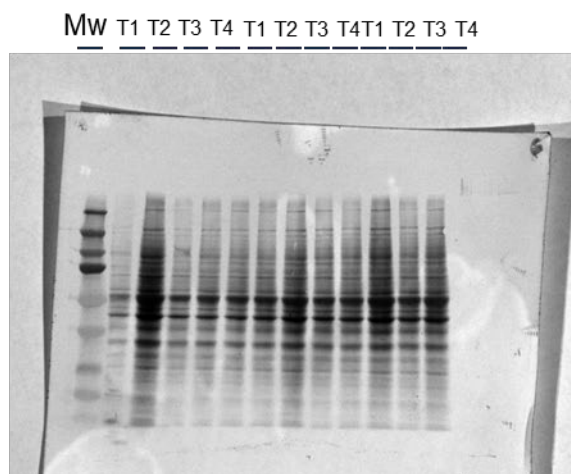

Supplement: s1 [file s1]
